# Supplementary material for: Trajectories of Prenatal Alcohol Consumption in An Australian Population-Based Cohort of Pregnant Women - A Data Driven Approach
Source: Research Square preprint supplement (doi:10.21203/rs.3.rs-760148/v1), 2021-08-06

**Supplementary material**

**Supplementary Figure 1** Original trajectory groups for prenatal alcohol consumption based on the five group model


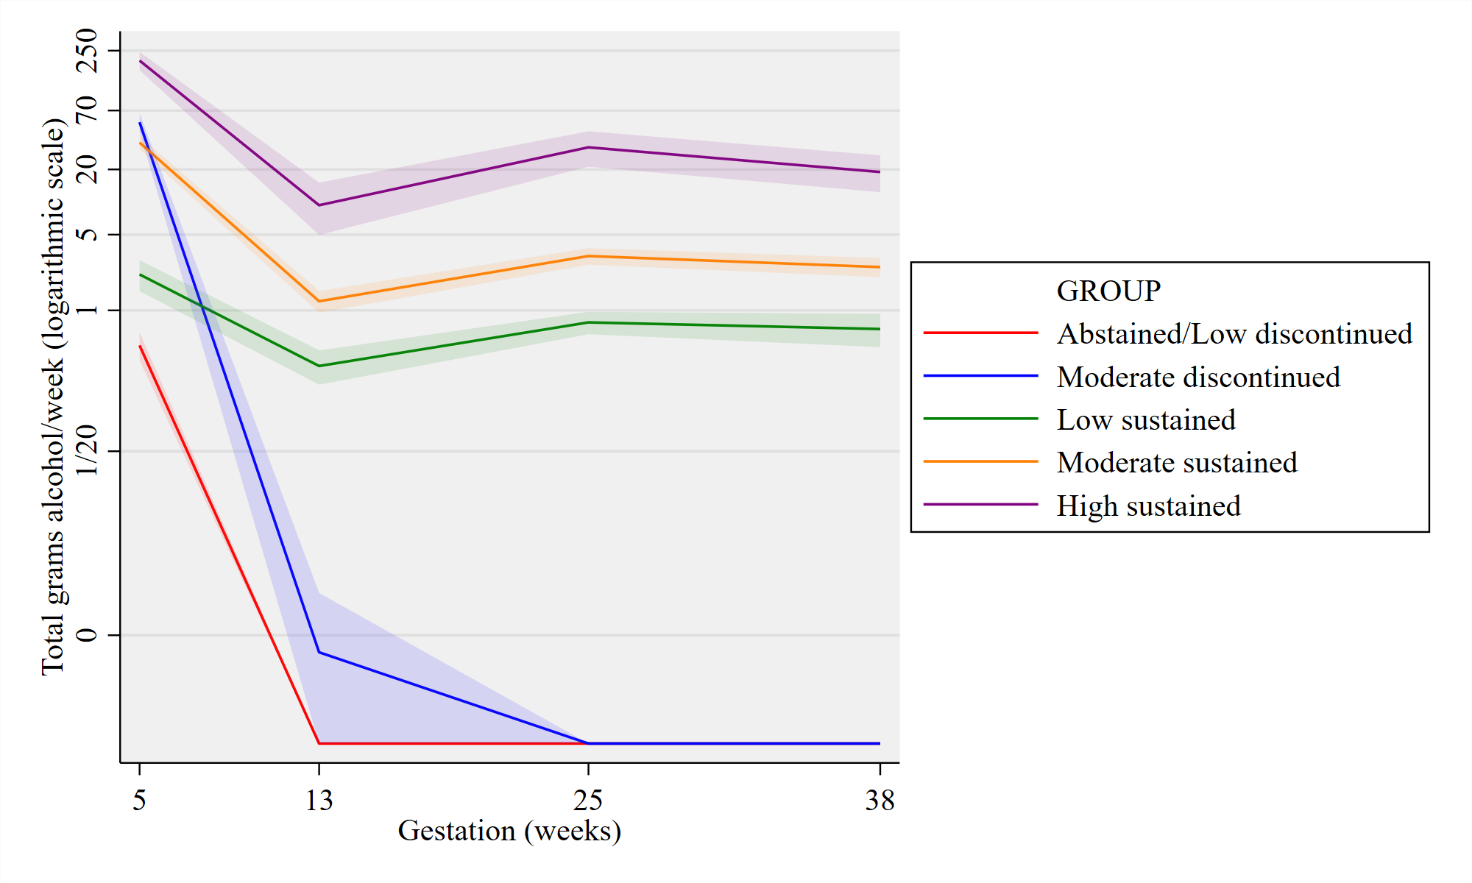


**Supplementary Figure 2** Trajectory groups for prenatal alcohol consumption with linear y-scale for reference


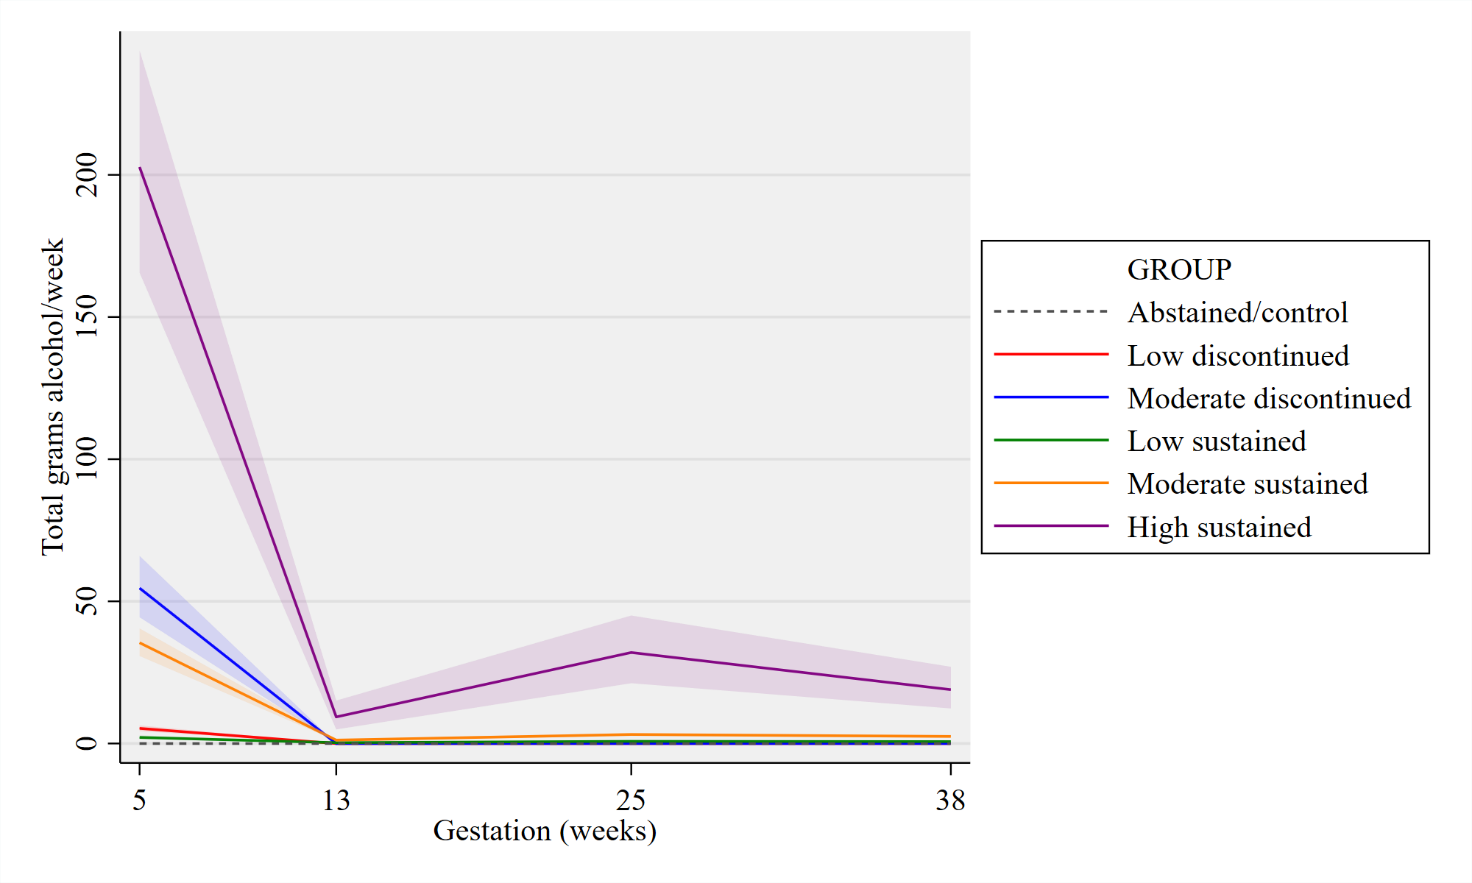

Supplement: Supplementary file 1 [file 696a99dc48d4769eae1a4650.docx]
